# Supplementary material
Source: publisher figshare collection journal article supplement (https://acs.figshare.com/ndownloader/files/8395514)
Supplement: Supplementary file 1 [file 8395514]

## Supporting Information

### CMPO-functionalized MIL-101(Cr) as highly selective uranium adsorbent

Jeroen De Decker<sup>a</sup>, Julie Rochette<sup>b,c</sup>, Jeriffa De Clercq<sup>d</sup>, Justyna Florek<sup>b,e</sup>\*, Pascal Van Der Voort<sup>a</sup>\*

- 
- <sup>a</sup> Department of Inorganic and Physical Chemistry, Centre for Ordered Materials, Organometallics, and Catalysis (COMOC), Ghent University, Krijgslaan 281-S3, 9000 Ghent, Belgium. E-mail: pascal.vandervoort@ugent.be
- <sup>b</sup> Department of Chemistry, Université Laval, Quebec City, Quebec G1V 0A6, Canada
- <sup>c</sup> Centre en Catalyse et Chimie Verte (C3V), Université Laval, Quebec City, Quebec G1V 0A6, Canada
- <sup>d</sup> Department of Materials, Textiles, and Chemical Engineering, Industrial Catalysis and Adsorption Technology (INCAT), Ghent University, Valentin, Vaerwyckweg 1, 9000 Ghent, Belgium
- <sup>e</sup> Institute of Inorganic Chemistry – Functional Materials, University of Vienna, Währinger Straße 42, 1090 Vienna, Austria, phone: +43 1 4277 52903. E-mail: justyna.florek@univie.ac.at
- 

**ABSTRACT:** The carbamoylmethylphosphine oxide (CMPO) functionalized MIL-101(Cr) was investigated as a potential uranium scavenger. This metal–organic framework-based adsorbent shows very high selectivity toward uranium, as well as thorium, in competition with various rare earth metals. Furthermore, it showed rapid adsorption kinetics, in both batch conditions and a dynamic (column) setup. The adsorbent is fully regenerable, using oxalate solution. Fast elution kinetics in the column setup were observed during the regeneration. In addition, reusability studies were performed under dynamic conditions. Five consecutive adsorption/desorption cycles were carried out, showing a consistent 100 % recovery, at pH 4, using 0.1 M oxalate solution as an effective stripping agent. Additionally, the successive use over various adsorption/desorption cycles with constant performance proves the high stability of this adsorbent in an acidic, aqueous environment.

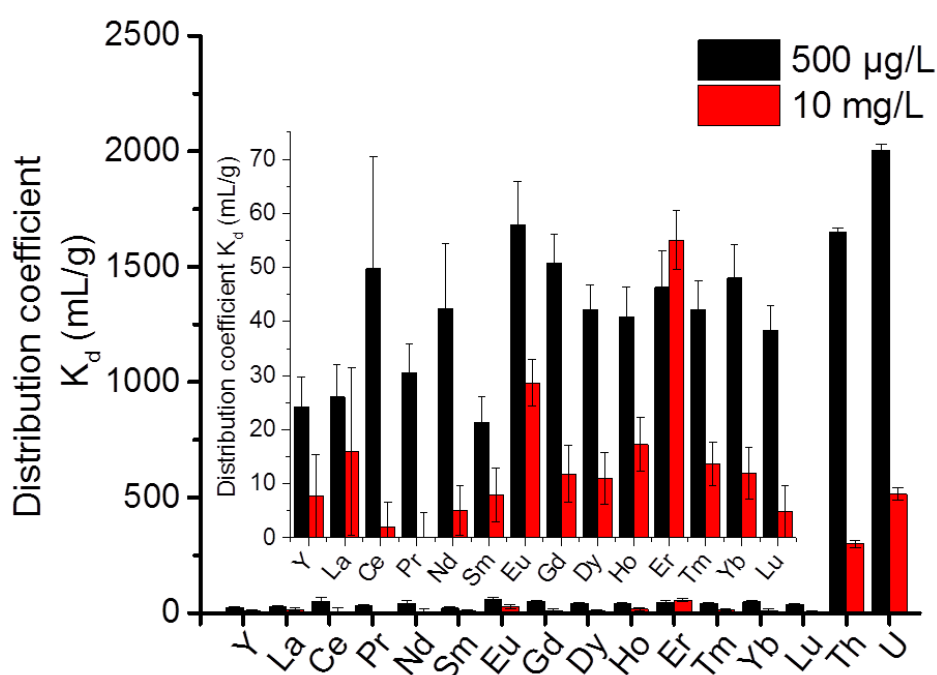

**Figure S1.** Selectivity results of CMPO@MIL-101(Cr). Zoom on the competing REE elements included.

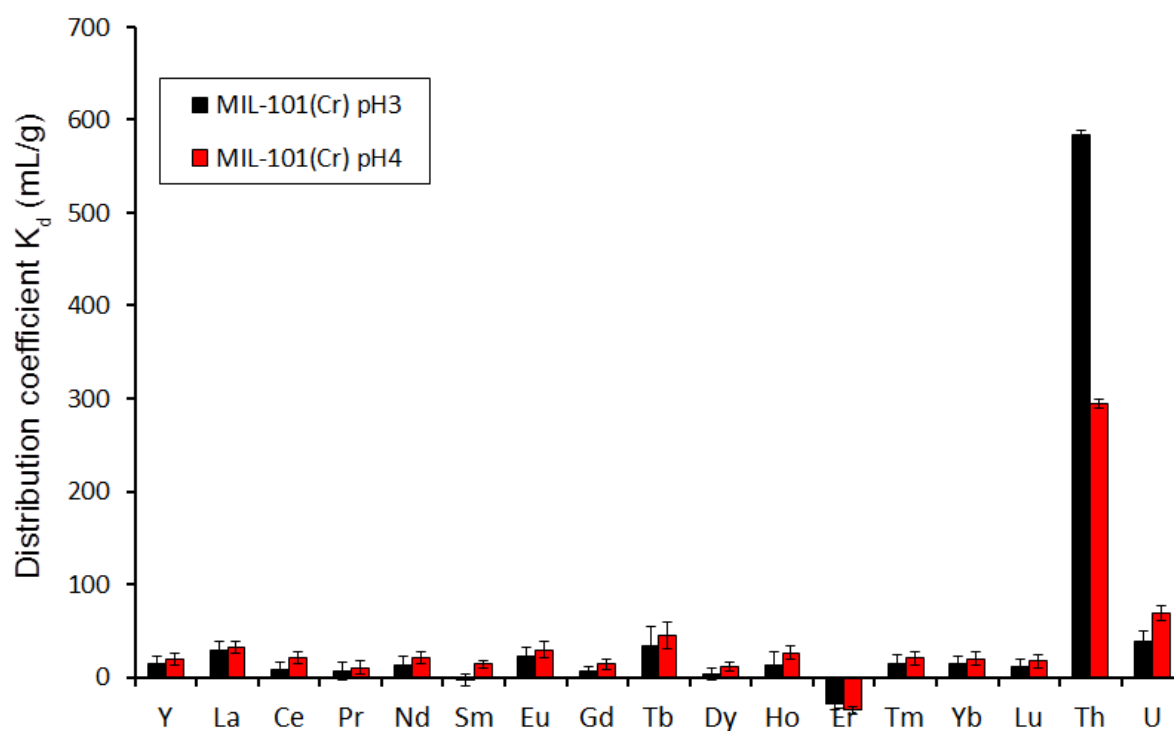

**Figure S2.** Selectivity results of pure MIL-101(Cr) at pH 3 and pH 4.  $C_0$ : 10 mg/L

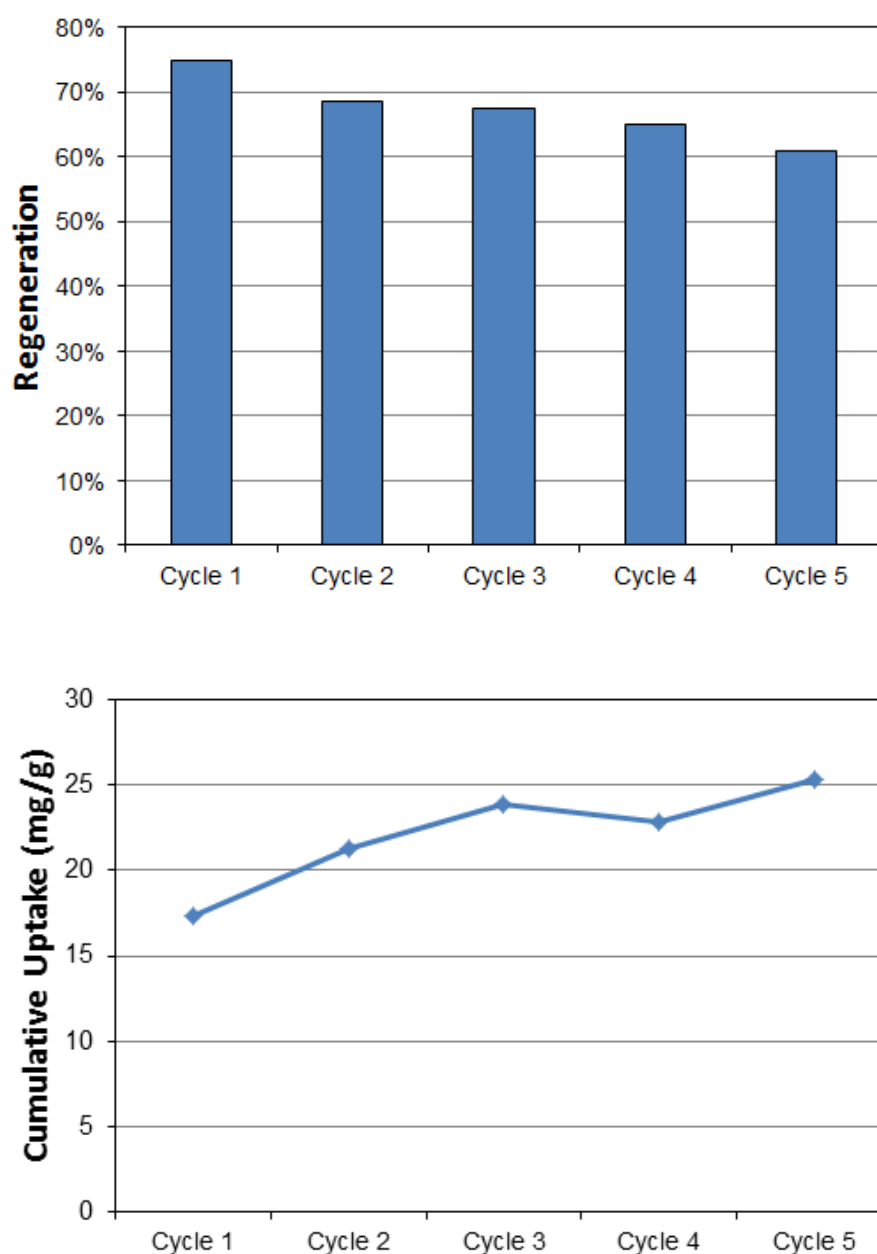

**Figure S3.** (Top) Uranium regeneration results for CMPO@MIL-101(Cr) using 0.1 M oxalate solution (pH 2) via column setup. (Bottom) Cumulative uranium uptake over five consecutive adsorption/desorption cycles with 0.1 M oxalate solution (pH 2) as stripping agent. (Experimental conditions in main article).

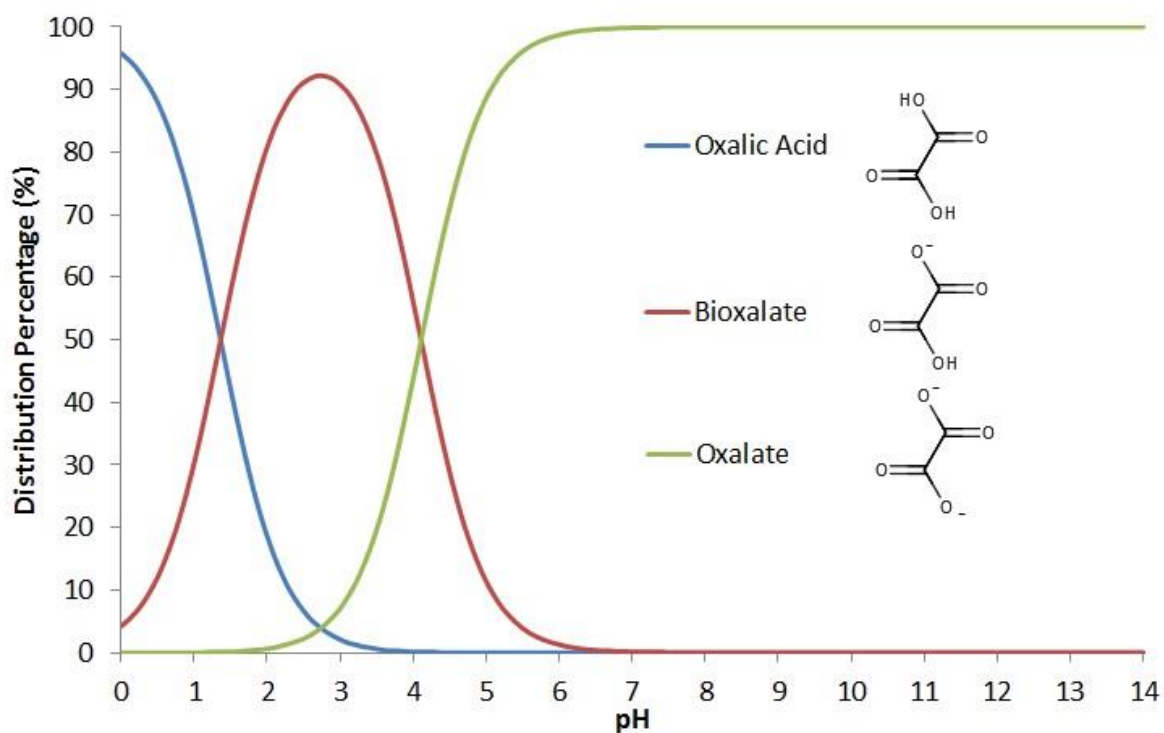

**Figure S4.** Speciation diagram for the oxalate system in water as a function of pH. The y-axis gives the fraction of each species present.

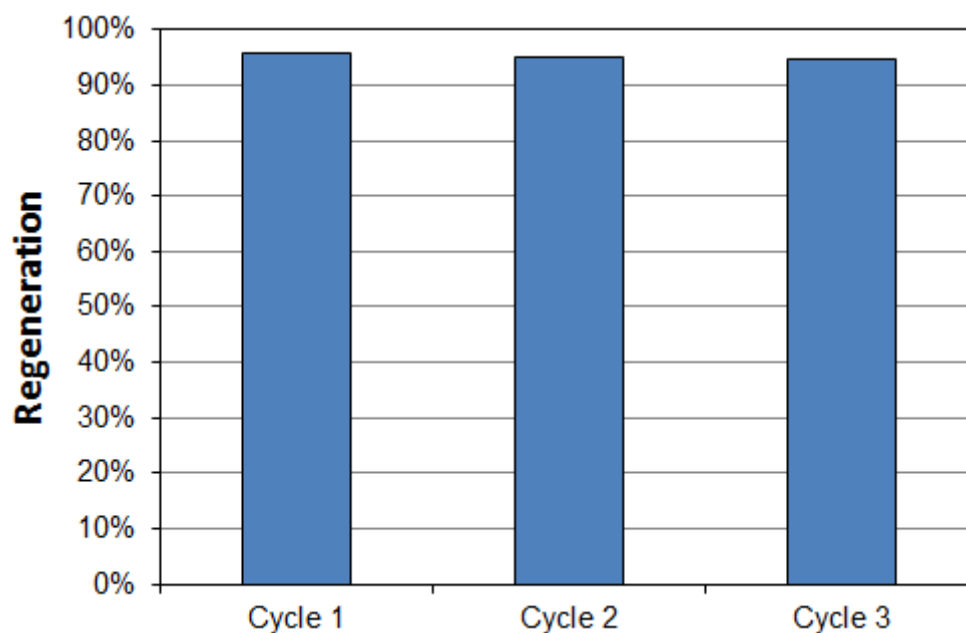

**Figure S5.** Uranium regeneration results for CMPO@MIL-101(Cr) using an increased 1 M oxalate solution (pH 2) via column setup. (Experimental conditions in main article).

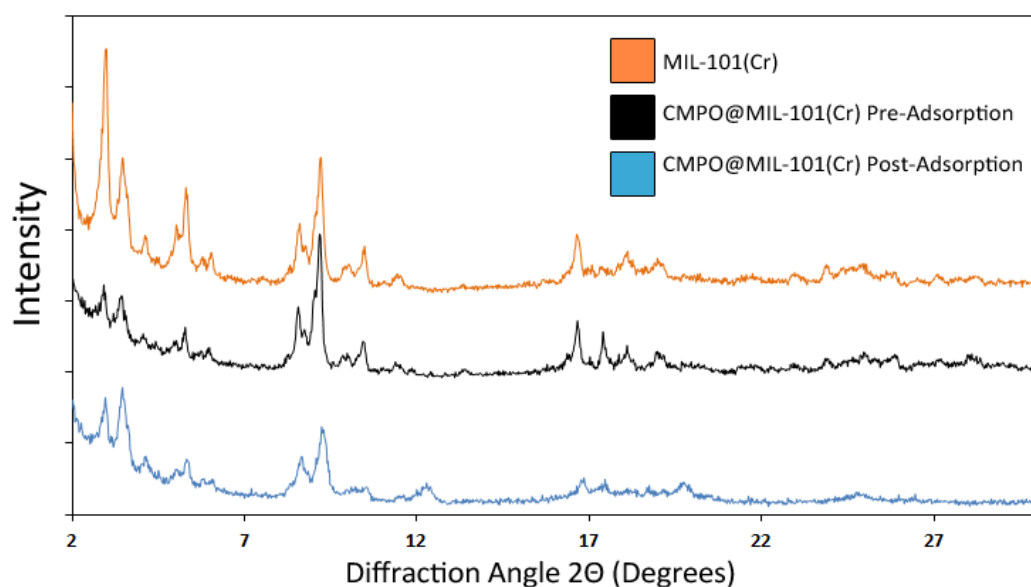

**Figure S6.** Powder X-ray Diffraction comparison of pristine MIL-101(Cr) (orange) and CMPO@MIL-101(Cr) pre- (black) and post-adsorption/desorption experiments (blue).

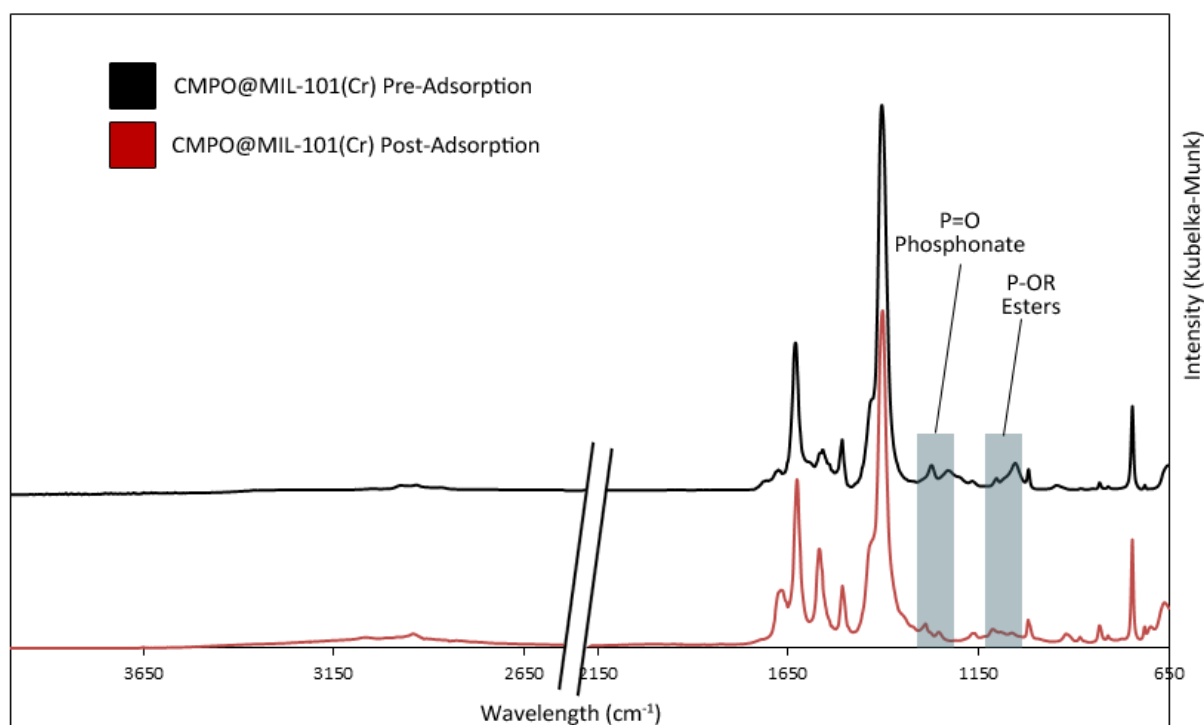

**Figure S7.** FTIR comparison (DRIFTS) of CMPO@MIL-101(Cr) pre- (black) and post-adsorption/desorption experiments (red). The zone of interest (i.e., corresponding to ligand vibrations) is highlighted and annotated.

**Table S1.** Numerical N<sub>2</sub>-adsorption data and leaching analysis for CMPO@MIL-101(Cr) prior/post column adsorption studies.

| <b>CMPO@MIL-101(Cr)</b>                                                                                                      | <b>S<sub>L</sub><sup>a</sup> (m<sup>2</sup>/g)</b> | <b>S<sub>BET</sub><sup>b</sup> (m<sup>2</sup>/g)</b> | <b>Pore Volume (cm<sup>3</sup>/g)</b> | <b>Leaching (wt. %)<sup>c</sup></b> |
|------------------------------------------------------------------------------------------------------------------------------|----------------------------------------------------|------------------------------------------------------|---------------------------------------|-------------------------------------|
| Prior adsorption studies                                                                                                     | 1336                                               | 1014                                                 | 0.59                                  | -                                   |
| Post adsorption studies                                                                                                      | 1780                                               | 1310                                                 | 0.68                                  | 15 %                                |
| <sup>a</sup> Langmuir model. <sup>b</sup> Calculated between p/p <sub>0</sub> 0.05 – 0.3. <sup>c</sup> As determined by XRF. |                                                    |                                                      |                                       |                                     |

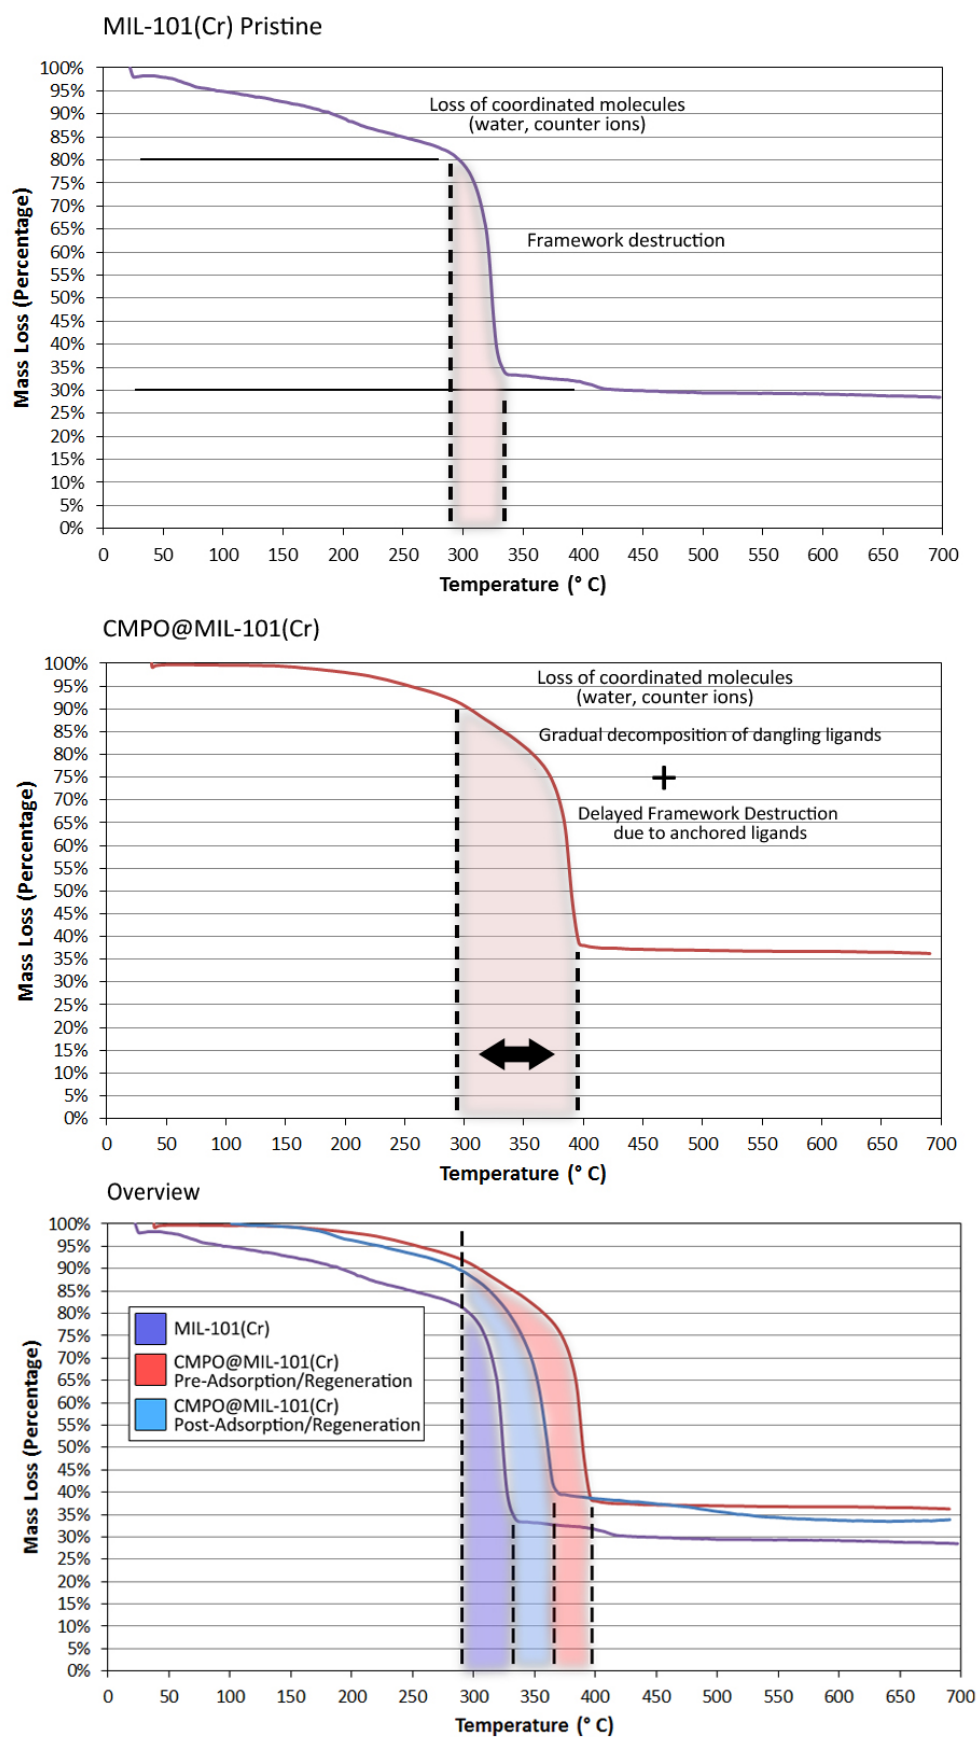

**Figure S8.** Comparison of Thermogravimetric analysis results of CMPO@MIL-101(Cr), pre- (red) and post-adsorption/desorption experiments (blue).
